# Supplementary material for: Complex Patterns of Genomic Heterogeneity Identified in 42 Tumor Samples and ctDNA of a Pulmonary Atypical Carcinoid Patient
Source: PubMed Central journal article supplement (PMC10035512; doi:10.1158/2767-9764.crc-22-0101), 2023-01-10
Supplement: crc-22-0101-s05.pdf [file crc-22-0101-s05.pdf]

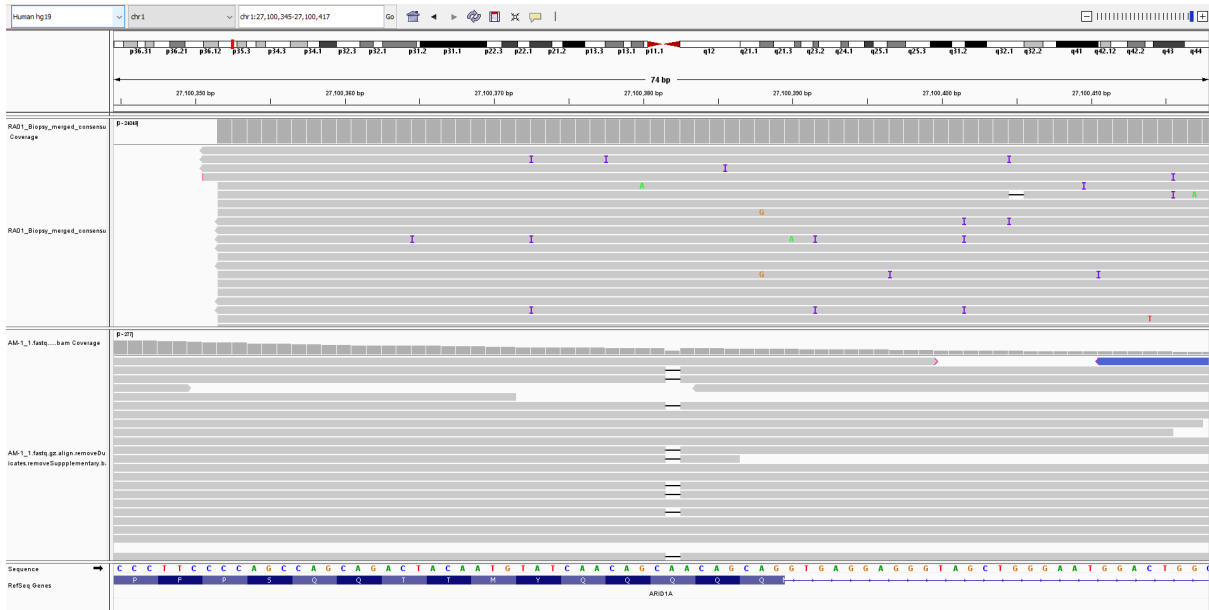

**Supplementary Figure S4: Absence of *ARID1A* variant in targeted panel sequencing of Biopsy 1 despite adequate depth**

Top panel shows Biopsy 1 targeted panel sequencing. Bottom panel shows representative tumor sampled at autopsy (Sc6) with heterozygous deletion in *ARID1A*, clearly absent from Biopsy 1 sequencing despite adequate depth (7240 unique molecules). The probability of not sampling the *ARID1A* variant in Biopsy 1 due to chance alone was calculated assuming tumor cellularity of 80% and the heterozygous *ARID1A* variant being present in 50% of tumor reads. 7240 unique molecules covered this genomic position. The binomial distribution in R was used to calculate the probability of not sampling this variant:  $\text{dbinom}(7240, \text{size}=7240, \text{prob}=0.6)$ .
